# Supplementary material
Source: PubMed Central journal article supplement (PMC2752874)
Supplement: NIHMS139382-supplement-1.pdf [file NIHMS139382-supplement-1.pdf]

# SUPPLEMENTAL MATERIAL

Table 1. Expression of Proteins in the Non-ischemic Territory

| <b>Proteins</b>                                                                      | <b>NC</b>   | <b>HC</b>   | <b>p value</b> |
|--------------------------------------------------------------------------------------|-------------|-------------|----------------|
| <b>PARP</b>                                                                          | 0.02±0.003  | 0.05±0.009  | 0.006          |
| <b>Cleaved PARP</b>                                                                  | 0.06±0.01   | 0.02±0.01   | 0.02           |
| <b>Caspase 3</b>                                                                     | 0.03±0.003  | 0.03±0.008  | 0.9            |
| <b>Cleaved caspase 3</b>                                                             | 0.02±0.004  | 0.04±0.01   | 0.3            |
| <b>Bnip-3</b>                                                                        | 0.04±0.01   | 0.1±0.01    | <0.001         |
| <b>Bcl 2</b>                                                                         | 0.03±0.003  | 0.02±0.003  | 0.03           |
| <b>Akt</b>                                                                           | 0.09±0.004  | 0.09±0.003  | 0.2            |
| <b>Phospho-Akt</b>                                                                   | 0.03±0.004  | 0.07±0.005  | <0.001         |
| <b>Erk 1/2</b>                                                                       | 0.1±0.01    | 0.2±0.01    | 0.002          |
| <b>Phospho-Erk 1/2</b>                                                               | 0.14±0.01   | 0.23±0.02   | <0.001         |
| <b>PKCε</b>                                                                          | 0.12±0.02   | 0.13±0.01   | 0.6            |
| <b>Phospho-PKCε</b>                                                                  | 0.05±0.01   | 0.13±0.02   | <0.001         |
| <b>Myeloperoxidase</b>                                                               | 0.03±0.01   | 0.09±0.03   | 0.04           |
| <b>p38</b>                                                                           | 0.004±0.001 | 0.067±0.013 | <0.001         |
| <b>Phospho-p38</b>                                                                   | 0.06±0.01   | 0.96±0.01   | 0.05           |
| <p>Data presented as mean±SEM in arbitrary units.<br/>Unpaired Student's t-test.</p> |             |             |                |

Table 2. Expression of Proteins in the Ischemic Territory

| <b>Proteins</b>                                                                                           | <b>NC</b>   | <b>HC</b>  | <b>p value</b> |
|-----------------------------------------------------------------------------------------------------------|-------------|------------|----------------|
| <b>eNOS</b>                                                                                               | 0.01±0.002  | 0,01±0.002 | 0.9            |
| <b>Phospho-eNOS</b>                                                                                       | 0.03±0.01   | 0.09±0.02  | 0.005          |
| <b>PARP</b>                                                                                               | 0.02±0.006  | 0.06±0.01  | 0.004          |
| <b>Cleaved PARP</b>                                                                                       | 0.07±0.01   | 0.02±0.01  | 0.007          |
| <b>Caspase 3</b>                                                                                          | 0.03±0.01   | 0.04±0.01  | 0.7            |
| <b>Cleaved caspase 3</b>                                                                                  | 0.01±0.004  | 0.02±0.01  | 0.4            |
| <b>Bnip-3</b>                                                                                             | 0.06±0.01   | 0.05±0.01  | 0.8            |
| <b>Bcl 2</b>                                                                                              | 0.05±0.01   | 0.02±0.01  | 0.04           |
| <b>Akt</b>                                                                                                | 0.08±0.01   | 0.06±0.01  | 0.05           |
| <b>Phospho-Akt</b>                                                                                        | 0.07±0.008  | 0.05±0.001 | 0.02           |
| <b>Erk 1/2</b>                                                                                            | 0.06±0.01   | 0.08±0.01  | 0.04           |
| <b>Phospho-Erk 1/2</b>                                                                                    | 0.12±0.03   | 0.08±0.02  | 0.3            |
| <b>PKCε</b>                                                                                               | 0.1±0.02    | 0.1±0.02   | 0.9            |
| <b>Phospho-PKCε</b>                                                                                       | 0.12±0.03   | 0.05±0.01  | 0.04           |
| <b>Myeloperoxidase</b>                                                                                    | 0.12±0.03   | 0.06±0.01  | 0.097          |
| <b>p38</b>                                                                                                | 0.003±0.001 | 0.06±0.02  | 0.009          |
| <p>Data presented as mean±SEM in arbitrary units.<br/>                     Unpaired Student's t-test.</p> |             |            |                |
